# Supplementary material for: Characterization of the infectious reservoir of malaria with an agent-based model calibrated to age-stratified parasite densities and infectiousness
Source: Springer Nature journal article supplement (doi:10.1186/s12936-015-0751-y), 2015-06-03
Supplement: MOESM3 [file 9761374]

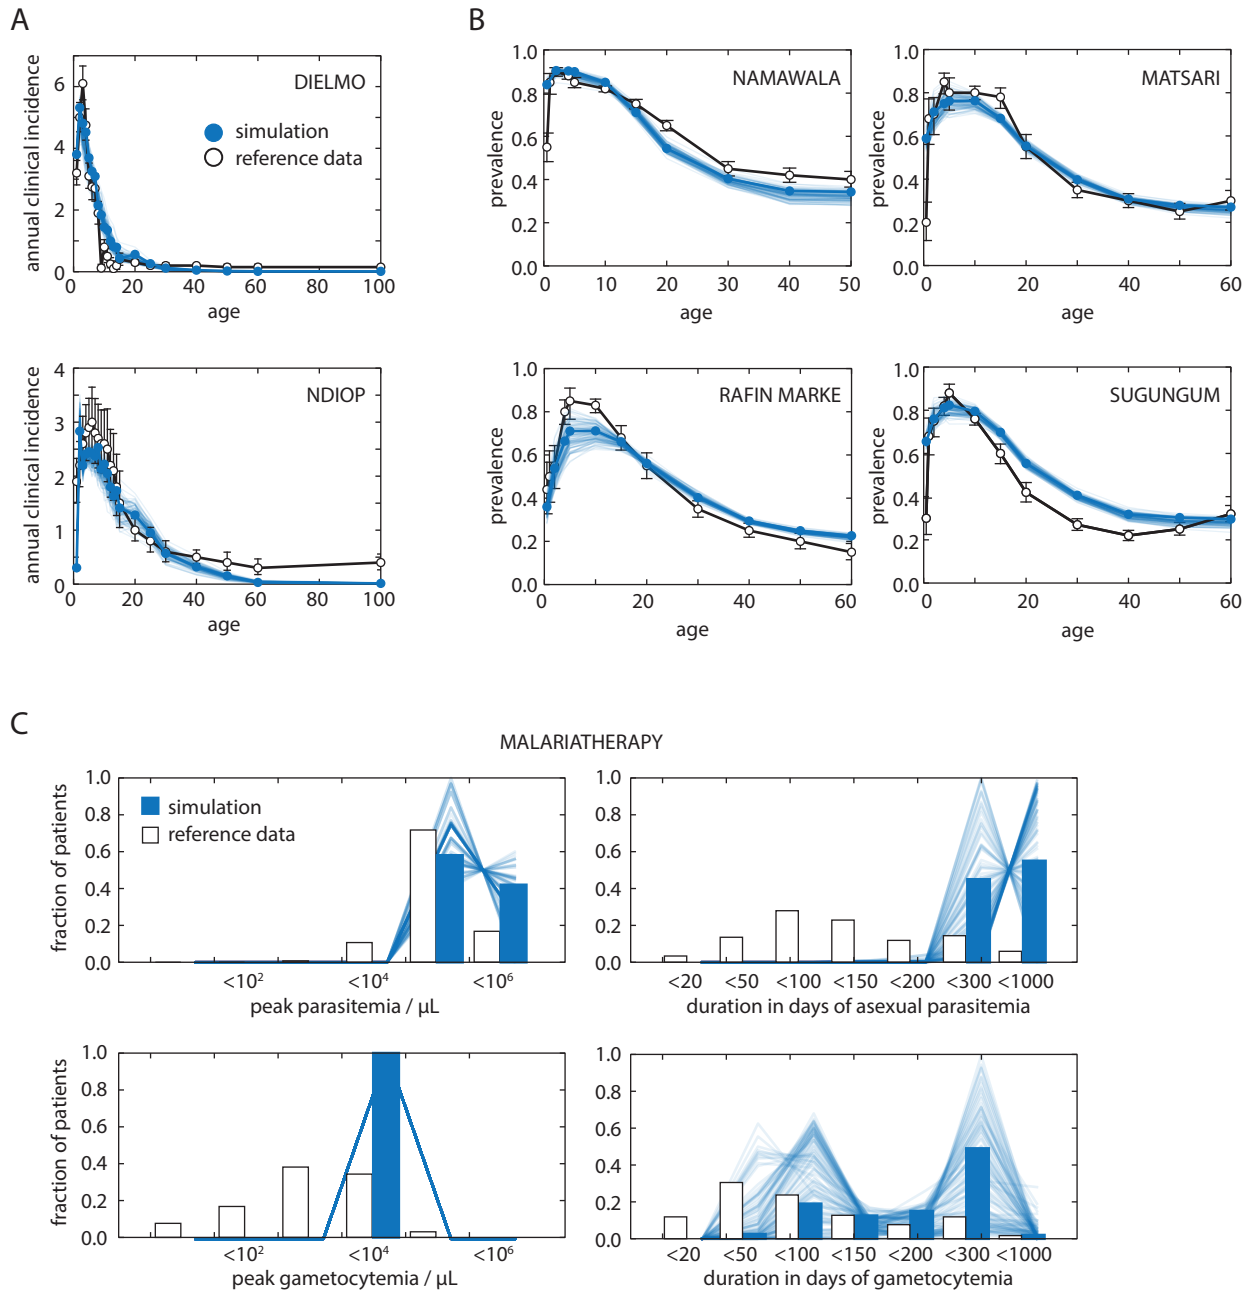

Comparison of incidence, prevalence, peak density, and infection duration between reference data and simulation with calibrated immunity and gametocyte development parameters. Simulation data corresponds to the single (solid blue) and 100 (transparent blue) parameter set(s) with highest combined likelihood across all study sites.
