# Supplementary material for: Characterization of the infectious reservoir of malaria with an agent-based model calibrated to age-stratified parasite densities and infectiousness
Source: Springer Nature journal article supplement (doi:10.1186/s12936-015-0751-y), 2015-06-03
Supplement: MOESM4 [file 9761374]

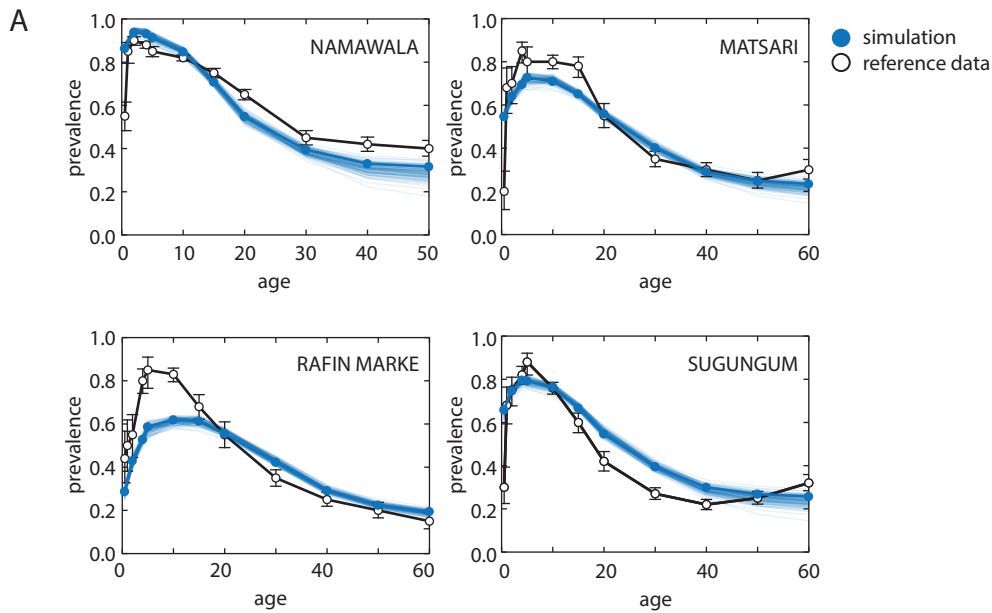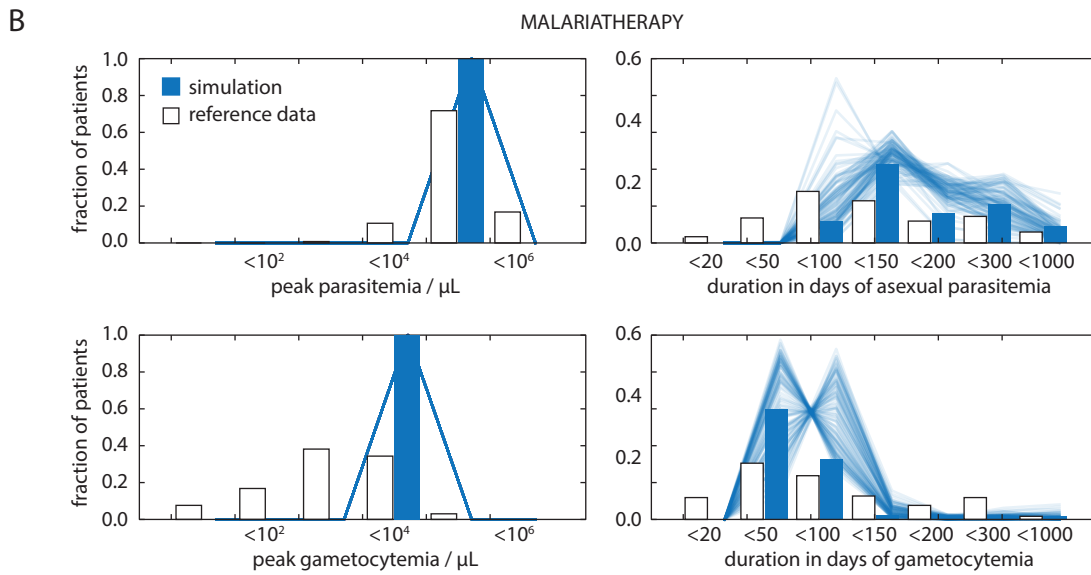

Comparison between simulation and reference data after calibration of immune and gametocyte parameters with full weighting of malariatherapy data. Fit to prevalence data is poorer than in Figure S1.
