# Supplementary material for: Characterization of the infectious reservoir of malaria with an agent-based model calibrated to age-stratified parasite densities and infectiousness
Source: Springer Nature journal article supplement (doi:10.1186/s12936-015-0751-y), 2015-06-03
Supplement: MOESM7 [file 9761374]

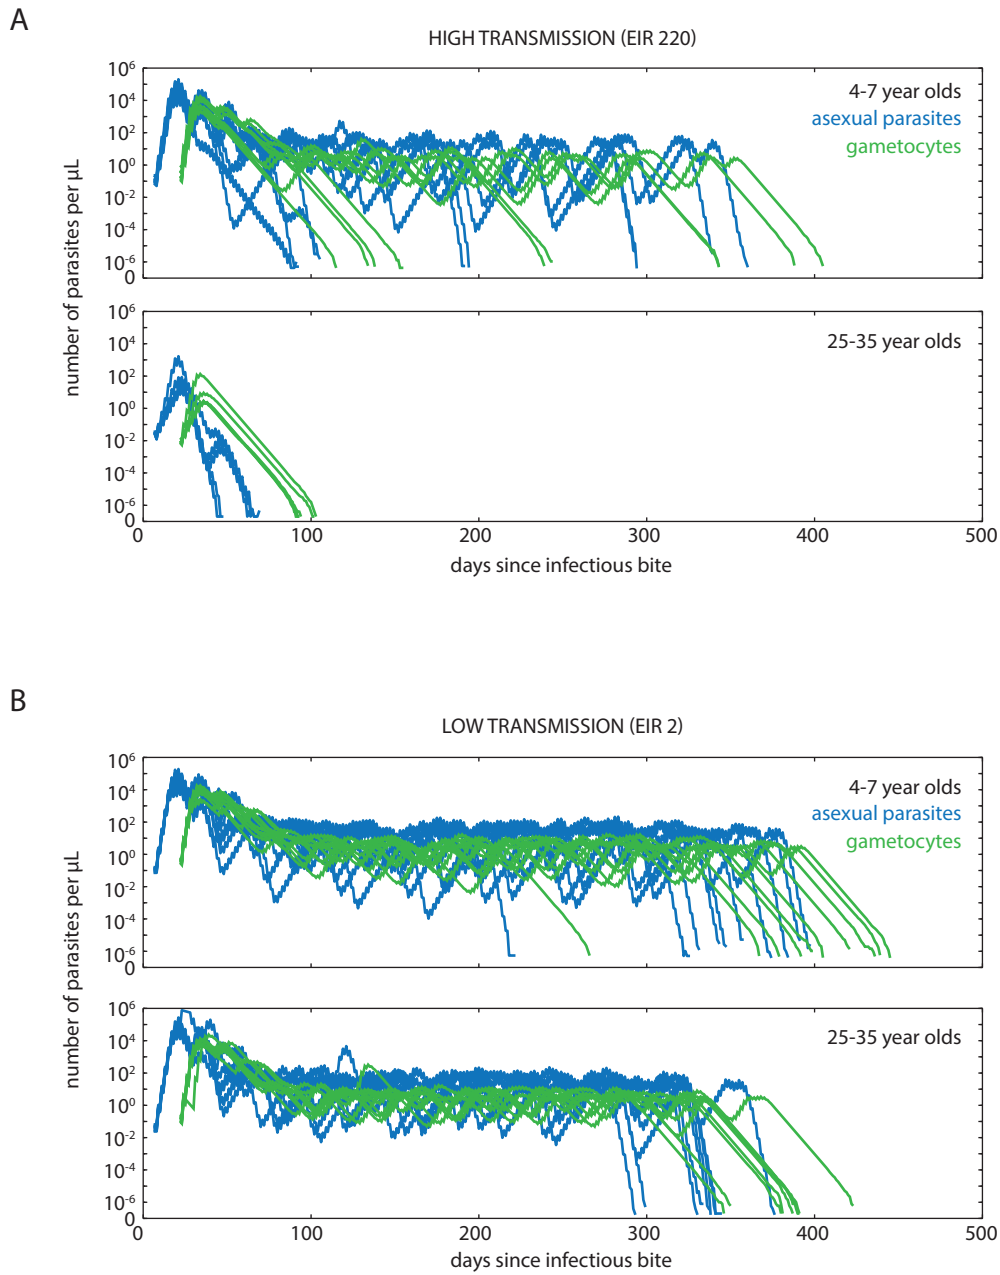

Trajectories of infection for children and adults in (A) high and (B) low transmission settings with calibrated immune and gametocyte parameters. 10 trajectories are shown for each age group. Each individual was challenged with an infectious bite on day 0 without the possibility of additional later infections.
